# Supplementary material for: Study of interaction of antimutagenic 1,4-dihydropyridine AV-153-Na with DNA-damaging molecules and its impact on DNA repair activity
Source: PeerJ. 2018 Apr 25;6:e4609. doi: 10.7717/peerj.4609 (PMC5923214; doi:10.7717/peerj.4609)
Supplement: Supplemental Information 3 — Primary results of comet assay of cells treated with peroxynitrite and AV-154, final results are given in Fig. 4. [file peerj-06-4609-s003.xls]

## Sheet: Лист1
		Primary results of comet assay of cells treated with peroxynitrite and AV-154, final results are given in Fig 8C.
			Damage classes (counted 100 cells per slide)					D=A1+ 2 x A2 + 3 x A3 + 4 x A4)
		Control	A0	A1	A2	A3	A4	Damage (arbitrary units
		n1	60	34	6	0	0	46
		n2	57	41	2	0	0	53
		n3	72	24	4	0	0	32
							Average	43
			Damage classes (counted 100 cells per slide)
		Vehicle Control	A0	A1	A2	A3	A4	Damage (arbitrary units)
		n1	56	27	17	0	0	61
		n2	68	24	8	0	0	40
		n3	65	25	10	0	0	45
							Average	48
			Damage classes (counted 100 cells per slide)
		Peroxynitrite Control	A0	A1	A2	A3	A4	Damage (arbitrary units)
		n1	0	46	32	19	3	179
		n2	0	37	36	20	7	190
		n3	0	41	37	18	4	181
							Average	183
			Damage classes (counted 100 cells per slide)
		AV-154-Na control (100nM)	A0	A1	A2	A3	A4	Damage (arbitrary units)
		n1	51	47	2	0	0	51
		n2	64	30	6	0	0	42
		n3	71	25	4	0	0	33
							Average	42
			Damage classes (counted 100 cells per slide)
		Pre-incub 10 nM	A0	A1	A2	A3	A4	Damage (arbitary units)
		n1	0	34	41	20	5	196
		n2	0	28	54	16	2	192
		n3	0	46	34	15	5	179
							Average	194
			Damage classes (counted 100 cells per slide)
		Pre-incub 50 nM	A0	A1	A2	A3	A4	Damage (arbitrary units)
		n1	0	31	47	15	7	198
		n2	0	28	51	17	4	197
		n3	0	35	45	16	4	189
							Average	195
			Damage classes (counted 100 cells per slide)
		Pre-incub 100 nM	A0	A1	A2	A3	A4	Damage (arbitrary units)
		n1	0	35	56	5	4	182
		n2	0	41	33	19	7	192
		n3	0	23	51	20	6	209
							Average	194
			Damage classes (counted 100 cells per slide)
		Simult. incub 10 nM	A0	A1	A2	A3	A4	Damage (arbitary units)
		n1	0	47	34	11	8	180
		n2	0	22	56	17	5	205
		n3	0	41	54	10	5	199
							Average	195
			Damage classes (counted 100 cells per slide)
		Simult. incub 50 nM	A0	A1	A2	A3	A4	Damage (arbitary units)
		n1	0	45	31	18	6	197
		n2	0	43	26	24	7	195
		n3	0	31	44	19	6	212
							Average	201
			Damage classes (counted 100 cells per slide)
		Simult. incub 100 nM	A0	A1	A2	A3	A4	Damage (arbitrary units)
		n1	0	48	33	13	6	189
		n2	0	27	48	18	8	209
		n3	0	39	36	16	9	195
							Average	198
