# Supplementary material for: Study of interaction of antimutagenic 1,4-dihydropyridine AV-153-Na with DNA-damaging molecules and its impact on DNA repair activity
Source: PeerJ. 2018 Apr 25;6:e4609. doi: 10.7717/peerj.4609 (PMC5923214; doi:10.7717/peerj.4609)
Supplement: Supplemental Information 4 [file peerj-06-4609-s004.xlsx]

## Sheet: All Data Fluorescence Intensity
																		Mean by Series									Mean by Series						Ratio TREATED / NON TREATED
	Normalized Fluorescence Intensity									Standard Deviation									Normalized Fluorescence Intensity
Series 1.1	8oxoG	AbaS	AlkB	CisP	CPD-64	Glycol	Pso			8oxoG	AbaS	AlkB	CisP	CPD-64	Glycol	Pso		Series 1	8oxoG	AbaS	AlkB	CisP	CPD-64	Glycol	Pso								Ratio >1 stimulation by the treatment
K (1)	7180620	9588000	9099984	763825	10804191	44617956	1606011		K (1)	113212	297590	831374	9512.76	920881	1.40567e+06	79493.8		K (1)	5574185	7846556	7.61936e+06	508904	9498738	3.81025e+07	1348511								Ratio <1 inhibition by the treatment
AV-153-3h (1)	8512557	10052286	10034999	341857	10258001	49358529	2131571		AV-153-3h (1)	168783	221966	468159	167.64	1.41419e+06	1.3255e+06	49720.7		AV-153-3h (1)	9.77024e+06	11840324	1.17595e+07	515523	12569129	5.5302e+07	2.35227e+06
AV-153-12h (1)	10742793	13461180	11544327	502910	10908248	45082614	2778603		AV-153-12h (1)	399448	469293	519253	-5213.39	920474	1.49178e+06	24432.9		AV-153-12h (1)	13021423	1.60584e+07	14921560	842058	13927796	5.44663e+07	3.24483e+06
AV-153-24h (1)	8704257	11450024	10721364	377768	9666579	43167303	2060411		AV-153-24h (1)	225262	511974	374963	5125.72	804595	1.30954e+06	39402.8		AV-153-24h (1)	1.04065e+07	13298264	12439596	635827	1.39839e+07	53705356	2.56426e+06								Series 1	8oxoG	AbaS	AlkB	CisP	CPD-64	Glycol	Pso
P (1)	8222681	9784067	10545174	667055	12940922	50704509	2178894		P (1)	335714	466012	506951	15010	485107	2.38702e+06	71389.9		P (1)	8.24004e+06	1.04107e+07	10576645	506113	12969281	5.35698e+07	2.11771e+06								AV-153-3h (1)	1.75277	1.50898	1.54337	1.01301	1.32324	1.4514	1.74435
PAV (1)	8460142	10330363	12092769	475062	13360136	53106575	2339281		PAV (1)	109508	211532	464931	15205.2	974729	1.35558e+06	46793.1		PAV (1)	6305558	9138200	9432049	345693	10653113	4.51905e+07	1877311								AV-153-12h (1)	2.33602	2.04655	1.95837	1.65465	1.46628	1.42947	2.40623
	Normalized Fluorescence Intensity									Standard Deviation									Normalized Fluorescence Intensity														AV-153-24h (1)	1.86692	1.69479	1.63263	1.2494	1.47219	1.4095	1.90155
Series 1.2	8oxoG	AbaS	AlkB	CisP	CPD-64	Glycol	Pso			8oxoG	AbaS	AlkB	CisP	CPD-64	Glycol	Pso		Series 2	8oxoG	AbaS	AlkB	CisP	CPD-64	Glycol	Pso								P (1)	1.47825	1.32678	1.38813	0.994516	1.36537	1.40594	1.57041
K (1)	3967750	6105112	6138733	253983	8193285	31587023	1091011		K (1)	51751.2	116947	36861.5	6475.37	434964	241133	17406.3		K (2)	5.91122e+06	9.13518e+06	8747237	647071	12283262	40888127	1.89773e+06								PAV (1)	1.13121	1.16461	1.23791	0.679289	1.12153	1.18602	1.39214
AV-153-3h (1)	11027926	13628362	13484022	689189	14880257	61245554	2572978		AV-153-3h (1)	38911	426514	162282	10849.1	560408	339584	19444.5		AV-153-3h (2)	5556934	9.74856e+06	8.95901e+06	763464	12367376	4.29035e+07	1783944
AV-153-12h (1)	15300053	18655535	18298793	1181206	16947344	63849897	3711056		AV-153-12h (1)	306104	634377	158475	56627.1	873638	1.42398e+06	53493.4		AV-153-12h (2)	9.31601e+06	13355985	1.10033e+07	976966	1.4055e+07	5.08449e+07	2.69643e+06								Series 2	8oxoG	AbaS	AlkB	CisP	CPD-64	Glycol	Pso
AV-153-24h (1)	12108838	15146504	14157828	893886	18301308	64243409	3068116		AV-153-24h (1)	171024	458570	331243	24487.4	440817	1.97733e+06	94905.4		AV-153-24h (2)	9.5284e+06	1.40547e+07	1.17393e+07	750146	1.42578e+07	52736854	2.94238e+06								AV-153-3h (2)	0.940065	1.06714	1.02421	1.17988	1.00685	1.04929	0.940041
P (1)	8257404	11037260	10608116	345171	12997640	56435150	2056533		P (1)	141633	184166	429578	8849.3	763203	987050	67017.3		P (2)	5498073	10403936	9125141	446370	1.24575e+07	4.4784e+07	1.53873e+06								AV-153-12h (2)	1.57599	1.46204	1.25792	1.50983	1.14424	1.24351	1.42087
PAV (1)	4150974	7946037	6771329	216324	7946090	37274334	1415341		PAV (1)	96825.7	198112	323584	17571.2	658992	1.19982e+06	52278.8		PAV (2)	7.44743e+06	1.15112e+07	1.10875e+07	627174	1.31513e+07	57131858	2.03137e+06								AV-153-24h (2)	1.61192	1.53852	1.34206	1.15929	1.16075	1.28978	1.55047
	Normalized Fluorescence Intensity									Standard Deviation									Normalized Fluorescence Intensity														P (2)	0.930108	1.13889	1.0432	0.689832	1.01418	1.09528	0.810828
Series 2.1	8oxoG	AbaS	AlkB	CisP	CPD-64	Glycol	Pso			8oxoG	AbaS	AlkB	CisP	CPD-64	Glycol	Pso		Series 3	8oxoG	AbaS	AlkB	CisP	CPD-64	Glycol	Pso								PAV (2)	1.25988	1.2601	1.26754	0.969251	1.07067	1.39727	1.07042
K (2)	3801479	6644007	6103814	827984	9208320	29583697	1341845		K (2)	42761.4	90838.1	80222.7	12078.6	417361	331234	7039.44		K (3)	4.52791e+06	9277951	7290620	467952	1.10233e+07	34348372	1.44655e+06
AV-153-3h (2)	5483002	9751753	8556428	830280	12213982	41661571	1866647		AV-153-3h (2)	127946	193683	291804	24839.7	577006	445691	29068.3		AV-153-3h (3)	9.78362e+06	13406051	1.14969e+07	825714	1.40058e+07	52394414	2.86347e+06								Series 3	8oxoG	AbaS	AlkB	CisP	CPD-64	Glycol	Pso
AV-153-12h (2)	8685128	12503044	9815985	693449	12284027	48284870	2285445		AV-153-12h (2)	100224	327755	354842	19810.3	771508	1.70279e+06	42192.6		AV-153-12h (3)	1.07757e+07	1.65349e+07	12669486	1101642	12846821	49023720	3051016								AV-153-3h (3)	2.16074	1.44494	1.57694	1.76453	1.27057	1.52538	1.97951
AV-153-24h (2)	9795433	13397936	11829405	887859	13935569	53273582	3099176		AV-153-24h (2)	191347	541498	811573	52709.7	657893	2.41695e+06	83624.8		AV-153-24h (3)	10073992	1.48955e+07	1.05385e+07	772972	1.49534e+07	5.24841e+07	2.65594e+06								AV-153-12h (3)	2.37985	1.78217	1.73778	2.35418	1.16543	1.42725	2.10916
P (2)	5841059	10424336	8963583	507374	12364664	44577049	1599814		P (2)	262695	133418	227617	11919.4	908176	877433	62766.3		P (3)	5.77645e+06	11374998	9295858	399580	12895292	4.66057e+07	1372861								AV-153-24h (3)	2.22487	1.60548	1.44549	1.65182	1.35653	1.52799	1.83604
PAV (2)	8895851	11464289	11333606	621706	13917245	62708384	2189350		PAV (2)	257027	134169	365081	27313.2	1.26674e+06	1.28181e+06	41811.4		PAV (3)	6.44503e+06	10752818	9217763	895154	1.27761e+07	4.54609e+07	1.7871e+06								P (3)	1.27574	1.22602	1.27504	0.853892	1.16982	1.35685	0.949056
	Normalized Fluorescence Intensity									Standard Deviation																							PAV (3)	1.4234	1.15896	1.26433	1.91292	1.15901	1.32352	1.23542
Series 2.2	8oxoG	AbaS	AlkB	CisP	CPD-64	Glycol	Pso			8oxoG	AbaS	AlkB	CisP	CPD-64	Glycol	Pso
K (2)	8020964	11626360	11390660	466158	15358204	52192557	2453616		K (2)	400415	506486	550229	15140.8	402893	1.04376e+06	48646.1																	Mean Ratio T/NT Series 1,23
AV-153-3h (2)	5630866	9745372	9361589	696648	12520770	44145350	1701241		AV-153-3h (2)	249394	148957	249156	17609.3	382321	323287	27750.4		Mean Series 1, 2 3															Mean 3 Series	8oxoG	AbaS	AlkB	CisP	CPD-64	Glycol	Pso
AV-153-12h (2)	9946887	14208926	12190602	1260483	15825930	53404961	3107410		AV-153-12h (2)	241093	91118.8	70081.9	31705.5	360004	650378	39003.9		3 Series	8oxoG	AbaS	AlkB	CisP	CPD-64	Glycol	Pso								AV-153-3h	1.61786	1.34035	1.38151	1.31914	1.20022	1.34202	1.55463
AV-153-24h (2)	9261374	14711435	11649278	612432	14580026	52200126	2785579		AV-153-24h (2)	101466	220404	317178	10357.2	407171	1.76712e+06	35944		K	5.33777e+06	8.75323e+06	7.88574e+06	541309	1.09351e+07	3.77797e+07	1.56427e+06								AV-153-12h	2.09729	1.76359	1.65136	1.83955	1.25865	1.36674	1.97875
P (2)	5155087	10383536	9286699	385366	12550279	44990872	1477653		P (2)	77357.6	26903.6	139419	5471.69	238388	454029	8421.34		AV-153-3h	8370266	1.1665e+07	1.07385e+07	701567	1.29808e+07	50199972	2.33323e+06								AV-153-24h	1.90123	1.61293	1.4734	1.35351	1.32982	1.40909	1.76269
PAV (2)	5999010	11558112	10841423	632642	12385344	51555332	1873399		PAV (2)	96727.4	132098	117868	9520.76	211278	513067	20015.8		AV-153-12h	1.10377e+07	15316415	1.28648e+07	973555	1.36099e+07	5.1445e+07	2.99742e+06								P	1.22803	1.23056	1.23546	0.84608	1.18312	1.28602	1.1101
	Normalized Fluorescence Intensity									Standard Deviation								AV-153-24h	10002981	14082833	1.15725e+07	719648	1.43984e+07	5.29754e+07	2.72086e+06								PAV	1.2715	1.19456	1.25659	1.18715	1.11707	1.30227	1.23266
Series 3.1	8oxoG	AbaS	AlkB	CisP	CPD-64	Glycol	Pso			8oxoG	AbaS	AlkB	CisP	CPD-64	Glycol	Pso		P	6.50485e+06	1.07299e+07	9.66588e+06	450688	1.2774e+07	4.83198e+07	1676436
K (3)	4671503	11062617	8726111	693126	13252798	39365883	1419313		K (3)	55817.1	177078	509705	7129.23	628428	953284	16690.9		PAV	6732672	1.04674e+07	9.91244e+06	622674	1.21935e+07	49261079	1898594								Standard Deviation Ratio T/NT Series 1,2,3
AV-153-3h (3)	11775854	14995801	14119307	1039077	16698153	60499225	3556330		AV-153-3h (3)	202661	526136	206793	17747.2	832655	2.38549e+06	14691.2																	SD 3 Series	8oxoG	AbaS	AlkB	CisP	CPD-64	Glycol	Pso
AV-153-12h (3)	10773479	16869111	13687555	1143113	13174287	50736856	2650676		AV-153-12h (3)	137843	767536	313676	64341.6	764811	1.4251e+06	76278.1		Standard Deviation Series 1, 2 3															AV-153-3h	0.621419	0.238764	0.309884	0.394641	0.169522	0.256201	0.545086
AV-153-24h (3)	9798023	17549936	11868331	894715	17528653	56675830	3015324		AV-153-24h (3)	218183	416622	807435	43724.4	1.7524e+06	2.80104e+06	65074.7		3 Series	8oxoG	AbaS	AlkB	CisP	CPD-64	Glycol	Pso								AV-153-12h	0.451989	0.292698	0.358137	0.451524	0.180126	0.106726	0.505459
P (3)	5032381	11810781	9099936	230101	12625105	46481203	923644		P (3)	102931	44125.9	319449	3450.14	844122	760812	28807.3		K	2.22196e+06	2.50096e+06	1.89962e+06	162914	1.50196e+06	6.99217e+06	577719								AV-153-24h	0.307913	0.0783998	0.14728	0.262247	0.157428	0.119106	0.186682
PAV (3)	7118718	12364213	10794022	1299541	14959271	51858617	2056049		PAV (3)	224085	60071.9	460531	17323.9	1.11581e+06	775980	54156.8		AV-153-3h	2.79363e+06	3.694e+06	3.22565e+06	237251	3.94255e+06	1.48686e+07	751557								P	0.277168	0.0940297	0.175837	0.152492	0.175971	0.167003	0.404588
	Normalized Fluorescence Intensity									Standard Deviation								AV-153-12h	3.7451e+06	5.17592e+06	4.38879e+06	335249	4.79923e+06	1.78429e+07	1.00377e+06								PAV	0.146443	0.0568274	0.016264	0.645038	0.0443404	0.107216	0.160874
Series 3.2	8oxoG	AbaS	AlkB	CisP	CPD-64	Glycol	Pso		Series 3.2	8oxoG	AbaS	AlkB	CisP	CPD-64	Glycol	Pso		AV-153-24h	3.31267e+06	4.84567e+06	4.04832e+06	231075	5.30887e+06	1.94561e+07	913991
K (3)	4384308	7493285	5855129	242777	8793771	29330861	1473796		K (3)	163397	433257	630141	21971.5	1.02024e+06	2.07164e+06	55766.3		P	2.04999e+06	3.58101e+06	3.42558e+06	148399	4.74179e+06	1.82417e+07	534751
AV-153-3h (3)	7791391	11816301	8874476	612350	11313464	44289603	2170609		AV-153-3h (3)	179613	395390	608943	42248.1	1.51561e+06	2.15703e+06	46008.7		PAV	2.14373e+06	3.56477e+06	3.53717e+06	256915	4.46944e+06	1.84738e+07	622190
AV-153-12h (3)	10777970	16200694	11651417	1060171	12519355	47310584	3451356		AV-153-12h (3)	446523	183588	1.47735e+06	46789.8	810606	889806	115426
AV-153-24h (3)	10349961	12241163	9208738	651228	12378182	48292449	2296551		AV-153-24h (3)	857094	106792	249345	19448	542709	2.79314e+06	25893.4
P (3)	6520510	10939215	9491780	569059	13165479	46730176	1822078		P (3)	44265	216573	372055	22636.4	1.56304e+06	1.78163e+06	35811.5
PAV (3)	5771337	9141423	7641504	490768	10592958	39063232	1518144		PAV (3)	173669	305210	497283	30204.4	706277	1.82964e+06	65131.3
	Normalized Fluorescence Intensity									Standard Deviation
B&C	8oxoG	AbaS	AlkB	CisP	CPD-64	Glycol	Pso		B&C	8oxoG	AbaS	AlkB	CisP	CPD-64	Glycol	Pso
B (1)	4314110	7614099	6822217	258801	8602188	35918553	1328408		B (1)	70328.6	157974	175995	7762.86	302921	633131	20162.3
B (2)	3711090	6947473	5857221	475116	7815749	31094146	1184086		B (2)	73284.8	26027.1	132738	13717.6	262261	1.10472e+06	56735.9
C(1)	5621772	11222855	9766696	934148	11921288	40566942	1818466		C(1)	185126	117181	144201	29484.6	596884	583106	22212.2
C (2)	4182217	8765817	7869521	471853	10268998	37597286	1354674		C (2)	130323	128040	165304	14583.6	720705	1.05862e+06	33745.6
									Mean Ratio T/NT Series 1,23
B&C	8oxoG	AbaS	AlkB	CisP	CPD-64	Glycol	Pso		T/NT	8oxoG	AbaS	AlkB	CisP	CPD-64	Glycol	Pso
K	5.33777e+06	8.75323e+06	7.88574e+06	541309	1.09351e+07	3.77797e+07	1.56427e+06		B (1)	0.808223	0.869862	0.865134	0.478102	0.786659	0.950738	0.849222
B (1)	4314110	7614099	6822217	258801	8602188	35918553	1328408		B (2)	0.695251	0.793704	0.742761	0.877717	0.71474	0.823039	0.75696
B (2)	3711090	6947473	5857221	475116	7815749	31094146	1184086		C(1)	1.05321	1.28214	1.23853	1.72572	1.09019	1.07378	1.1625
C(1)	5621772	11222855	9766696	934148	11921288	40566942	1818466		C (2)	0.783514	1.00144	0.997943	0.871689	0.939086	0.995173	0.866013
C (2)	4182217	8765817	7869521	471853	10268998	37597286	1354674
